# Supplementary material for: Characterization of Peripheral Blood TCR in Patients with Type 1 Diabetes Mellitus by BD RhapsodyTM VDJ CDR3 Assay
Source: MDPI journal article supplement (doi:10.3390/cells11101623), 2022-05-12

**Supplementary Table S1. Clinical characteristics of the study patients**

| Sample                                    | 1      | 2      | 3      | 4      |
|-------------------------------------------|--------|--------|--------|--------|
| Sex                                       | Male   | Female | Male   | Male   |
| Type                                      | 1A     | 1B     | 1B     | SPIDDM |
| Age, yrs                                  | 71     | 68     | 47     | 49     |
| Disease duration                          | 16     | 46     | 19     | 7      |
| Height, cm                                | 169    | 150.2  | 181    | 168.4  |
| Body weight, kg                           | 57     | 45     | 100    | 76     |
| Body mass index, kg/m <sup>2</sup>        | 20.0   | 19.9   | 30.5   | 26.8   |
| Fasting plasma glucose, mmol/L            | 7.2    | 4.3    | 11.3   | 7.3    |
| Hemoglobin A1c, %                         | 8.1    | 7.5    | 7.5    | 8.5    |
| C-peptide, mmol/L                         | < 0.01 | < 0.01 | < 0.01 | 0.301  |
| Creatinine, mmol/L                        | 65.4   | 66.3   | 86.6   | 84.9   |
| Estimated GFR, mL/min/1.73m <sup>2</sup>  | 79.4   | 58.5   | 66.1   | 66.8   |
| Urine albumin to creatinine ratio, mg/gCr | 3673   | 64     | 8      | 19     |
| Anti-GAD antibody                         | 237    | <5     | <5     | 18.1   |

Cr, creatinine; GAD, Glutamic Acid Decarboxylase; GFR, glomerular filtration rate; SPIDDM, slowly progressive insulin-dependent diabetes mellitus.

**Supplementary Table S2. Shannon-index H'**

|           | TRA   | TRB   |
|-----------|-------|-------|
| S1        | 10.80 | 10.83 |
| S2        | 11.62 | 11.69 |
| S3        | 10.26 | 10.57 |
| S4        | 11.37 | 11.25 |
| S1 FOXP3+ | 5.37  | 5.57  |
| S2 FOXP3+ | 6.27  | 6.35  |
| S3 FOXP3+ | 5.62  | 6.14  |
| S4 FOXP3+ | 5.84  | 5.77  |
| S1 CD8+   | 9.17  | 9.14  |
| S2 CD8+   | 9.74  | 9.77  |
| S3 CD8+   | 8.24  | 8.61  |
| S4 CD8+   | 9.44  | 9.37  |

TRA, T cell receptor alpha; TRAB, T cell receptor beta.



**Supplementary Table S3. TCR clonotype of CD8 positive cells**

|    | Clone ID | Frequency (%) | TRA     |                    | TRB  |       |                  |      |
|----|----------|---------------|---------|--------------------|------|-------|------------------|------|
|    |          |               | TRAV    | CDR3               | TRAJ | TRBV  | CDR3             | TRBJ |
| S1 | 1-1      | 7.9           | V27     | AGAISNNDMR         | J43  | V9    | ASSVVGSGTDEQF    | J2-1 |
|    | 1-2      | 7.4           | V13-1   | AASGSSASKII        | J3   | V6-5  | ASSYSGQGSYT      | J1-2 |
|    | 1-3      | 4.0           | V17     | ATDSGGYQKVT        | J13  | V19   | ASRLTGAGANVLT    | J2-6 |
|    | 1-4      | 3.6           | V1-1    | AVRDLDGGFKTI       | J9   | V10-3 | AISEPEGNTEAF     | J1-1 |
|    | 1-5      | 3.4           | V14/DV4 | AMRRPSGGYNKLI      | J4   | V19   | ASNAGYNEQF       | J2-1 |
|    | 1-6      | 3.1           | V13-1   | AASWDNAGNMLT       | J39  | V12-3 | ASSDGTGGYEYQY    | J2-7 |
|    | 1-7      | 2.7           | V12-2   | AVNPRRGFKTI        | J9   | V27   | ASSLGLAGGYEQF    | J2-1 |
|    | 1-8      | 2.6           | V6      | ARASYGGATNKLI      | J32  | V9    | ASSVTFERVPGANVLT | J2-6 |
|    | 1-9      | 2.6           | V1-1    | APDTGRRALT         | J5   | V20-1 | SARVVTGSSYEYQY   | J2-7 |
|    | 1-10     | 2.6           | V17     | ATDMEEGGSQGNLI     | J42  | V19   | ASNAGYNEQF       | J2-1 |
| S2 | 2-1      | 18.1          | V12-1   | VVRARPLPWSGGGADGLT | J45  | V7-2  | ASTPPSSPGYEYQY   | J2-7 |
|    | 2-2      | 10.3          | V12-3   | VPGGSASKII         | J3   | V20-1 | SARGRPAGEQF      | J2-1 |
|    | 2-3      | 9.1           | V6      | ALKGYSGGYQKVT      | J13  | V28   | ASSFSDRVNQPQH    | J1-5 |
|    | 2-4      | 8.1           | V17     | ATEGDSNYQLI        | J33  | V7-3  | ASSSGTGDSLH      | J1-6 |
|    | 2-5      | 5.6           | V12-3   | AMSDYGGATNKLI      | J32  | V5-1  | ASSPGRDRGSYEYQY  | J2-7 |
|    | 2-6      | 5.2           | V21     | AVSPLSSGSARQLT     | J22  | V7-2  | ASSLVSGPTYEQY    | J2-7 |
|    | 2-7      | 4.8           | V9-2    | AFDGGGATNKLI       | J32  | V4-2  | ASSPGLGQPQH      | J1-5 |
|    | 2-8      | 4.4           | V5      | AESSGTGKLI         | J37  | V24-1 | ATSDPAGGRADTQY   | J2-3 |
|    | 2-9      | 4.3           | V12-1   | VVNPRGSTLGRLY      | J18  | V10-2 | ASSAGQGEAF       | J1-1 |
|    | 2-10     | 3.5           | V14/DV4 | AMQIDSWGKLQ        | J24  | V29-1 | SVEDPHMDTQY      | J2-3 |
| S3 | 3-1      | 5.6           | V38-1   | AFSGGYQKVT         | J13  | V7-9  | ASSLAGEGSGTGELF  | J2-2 |
|    | 3-2      | 3.4           | V2      | AVEDLLNSGYSTLT     | J11  | V6-2  | ASSLRDSSYEYQY    | J2-7 |

|    |      |     |               |                |     |       |                    |      |
|----|------|-----|---------------|----------------|-----|-------|--------------------|------|
|    | 3-3  | 3.3 | V21           | AQGAYKLS       | J20 | V7-6  | ASSPREAYEQY        | J2-7 |
|    | 3-4  | 2.7 | V14/DV4       | AMREGGSGYSTLT  | J11 | V2    | ASSDRRGSSDTQY      | J2-3 |
|    | 3-5  | 2.5 | V27           | GLN            | J41 | V20-1 | SALRSGELF          | J2-2 |
|    | 3-6  | 2.4 | V12-3         | AMSGNQFY       | J49 | V28   | ASRRFTGTDTQY       | J2-3 |
|    | 3-7  | 2.3 | V12-3         | AMTAGTYKYI     | J40 | V29-1 | SADSSVGFHNEQF      | J2-1 |
|    | 3-8  | 2.3 | V14/DV4       | AMREYGNQFY     | J49 | V5-4  | ASSRGQQPSYEQY      | J2-7 |
|    | 3-9  | 2.2 | V12-2         | AVNNQAGTALI    | J15 | V4-3  | ASSQDLGANTEAF      | J1-1 |
|    | 3-10 | 2.1 | V38-<br>2/DV8 | AYRSRGDMR      | J43 | V27   | ASSFLAGATGELF      | J2-2 |
| S4 | 4-1  | 9.3 | V10           | VVSAFFSGGSYIPT | J6  | V5-1  | ASSSSRDRGNYEQY     | J2-7 |
|    | 4-2  | 5.5 | V21           | AVKGGSEKLV     | J57 | V7-8  | ASSLVGLESYNEQF     | J2-1 |
|    | 4-3  | 3.7 | V12-1         | AVNLNTGFQKLV   | J8  | V2    | ASRGYSYEQY         | J2-7 |
|    | 4-4  | 3.1 | V12-3         | AMVRAGGYNKLI   | J4  | V6-6  | ASRSERESPISNEQF    | J2-1 |
|    | 4-5  | 3.1 | V5            | AALSGGSYIPT    | J6  | V4-3  | ASSQGLREGLGEQY     | J2-7 |
|    | 4-6  | 3.1 | V14/DV4       | AMRNKSWGKFQ    | J24 | V3-1  | ASSQEIVRTSGENTGELF | J2-2 |
|    | 4-7  | 3.0 | V6            | ALGHSSASKII    | J3  | V20-1 | SARDRDSSSYEQY      | J2-7 |
|    | 4-8  | 2.9 | V21           | AVASNFGNEKLT   | J48 | V29-1 | SVAAGAQTQY         | J2-5 |
|    | 4-9  | 2.3 | V2            | AVEERIMGTYKYI  | J40 | V20-1 | SARGVAANPYEQY      | J2-7 |
|    | 4-10 | 2.3 | V12-1         | VVPYNTDKLI     | J34 | V5-6  | ASKPPGGSIIYEQY     | J2-7 |

CDR3, complementarity-determining region 3; TRA, T cell receptor alpha; TRAJ, TRA joining; TRAV, TRA variable; TRB, T cell receptor beta; TRBJ, TRB variable; TRBV, TRB variable.

**Supplementary Table S4. TCR clonotype of FOXP3 positive cells**

|    | Clone ID | Frequency (%) | TRA       |                |      | TRB   |                  |      |
|----|----------|---------------|-----------|----------------|------|-------|------------------|------|
|    |          |               | TRAV      | CDR3           | TRAJ | TRBV  | CDR3             | TRBJ |
| S1 | 1-1      | 6.7           | V12-3     | AMRFKSGYNKLI   | J4   | V18   | ASSPPTSGASYEQY   | J2-7 |
|    | 1-2      | 6.3           | V12-2     | AVNIRDSSYKLI   | J12  | V20-1 | SARSRLAVSGELF    | J2-2 |
|    | 1-3      | 6.0           | V12-3     | AMSDSGGGADGLT  | J45  | V3-1  | ASSQRGGTQY       | J2-3 |
|    | 1-4      | 5.9           | V12-1     | VGLTNAGKST     | J27  | V11-2 | ASSLGTQTTNEKLF   | J1-4 |
|    | 1-5      | 5.6           | V2        | AVEGGSGNTGKLI  | J37  | V2    | ASSEEGNTEAF      | J1-1 |
|    | 1-6      | 4.6           | V9-2      | ATTRYSGAGSYQLT | J28  | V28   | ASTGTTSINEQY     | J2-7 |
|    | 1-7      | 4.1           | V16       | A*RNFGNEKLT    | J48  | V12-3 | ASSSRGGDNQPQH    | J1-5 |
|    | 1-8      | 3.2           | V25       | GRSGSARQLT     | J22  | V30   | AWNRQGANTGELF    | J2-2 |
|    | 1-9      | 3.1           | V13-1     | AAPTIGRSKLT    | J56  | V7-3  | ASSPLSSGANVLT    | J2-6 |
|    | 1-10     | 3.0           | V4        | LVAFDTGRRALT   | J5   | V23-1 | ASSPPKFELLRAV    | J2-7 |
| S2 | 2-1      | 17.2          | V9-2      | ALSSNDYKLS     | J20  | V12-3 | ASTLDGPGSPLH     | J1-6 |
|    | 2-2      | 9.3           | V9-2      | ALSGRNTGGFKTI  | J9   | V2    | ASSRTKTDYQY      | J2-3 |
|    | 2-3      | 7.2           | V35       | AGPYSGAGSYQLT  | J28  | V28   | ASSPSSGRASYEQY   | J2-7 |
|    | 2-4      | 5.4           | V41       | AVNAGNMLT      | J39  | V7-9  | ASSSLDRGNIQY     | J2-4 |
|    | 2-5      | 4.5           | V13-1     | AASRPQGRRC*RTH | J45  | V7-9  | ASRLDATNEKLF     | J1-4 |
|    | 2-6      | 4.3           | V38-2/DV8 | AYRSYGAGNMLT   | J39  | V28   | ASSQQGRQETQY     | J2-5 |
|    | 2-7      | 3.5           | V12-1     | VVRLNTGGFKTI   | J9   | V20-1 | SARVGSTEKLF      | J1-4 |
|    | 2-8      | 2.9           | V41       | AVSSTPARQLT    | J22  | V6-6  | ASSYSGSGSRRWHEQY | J2-7 |
|    | 2-9      | 2.8           | V38-2/DV8 | APLGAGSYQLT    | J28  | V20-1 | SASLMAVSYEQY     | J2-7 |
|    | 2-10     | 2.5           | V12-1     | VVNKQTGANNLF   | J36  | V28   | ASRRRGGGTGELF    | J2-2 |
| S3 | 3-1      | 3.2           | V21       | GFSSGSARQLT    | J22  | V7-2  | ASSFGRYEQY       | J2-7 |
|    | 3-2      | 2.6           | V22       | AANTPLV        | J29  | V12-3 | ASSLLVDTQY       | J2-3 |

|    |      |     |       |                  |     |       |                  |      |
|----|------|-----|-------|------------------|-----|-------|------------------|------|
|    | 3-3  | 2.5 | V21   | AVTTGKST         | J27 | V20-1 | SGQGTDTQY        | J2-3 |
|    | 3-4  | 2.1 | V12-1 | VVNMGGGFKTI      | J9  | V20-1 | SASGGPGYNEQF     | J2-1 |
|    | 3-5  | 2.1 | V13-1 | AAGPMDSSYKLI     | J12 | V6-1  | ASRLALTYNEQF     | J2-1 |
|    | 3-6  | 1.9 | V13-1 | AARGTSYGKLT      | J52 | V20-1 | SARDPSSGLYNEQF   | J2-1 |
|    | 3-7  | 1.7 | V21   | AVRDDYKLS        | J20 | V20-1 | SAGPGLAGVYEQF    | J2-1 |
|    | 3-8  | 1.6 | V6    | ALEDTGRRALT      | J5  | V25-1 | ASTAPLGGLKQY     | J2-3 |
|    | 3-9  | 1.5 | V21   | AVYTSGSARQLT     | J22 | V6-5  | ASSQGGGNTIY      | J1-3 |
|    | 3-10 | 1.5 | V9-2  | ALISSGSARQLT     | J22 | V10-2 | ASSESRGSSNQPQH   | J1-5 |
| S4 | 4-1  | 4.4 | V13-1 | AAGRGNRLA        | J7  | V12-3 | ASSRTGGGYGYT     | J1-2 |
|    | 4-2  | 4.3 | V10   | VVRIA AISNTGKLI  | J37 | V24-1 | ATSDHTQGRQGYT    | J1-2 |
|    | 4-3  | 3.8 | V12-2 | AVNGENFNKFY      | J21 | V12-3 | ASSLAGTGVGYT     | J1-2 |
|    | 4-4  | 3.8 | V2    | AVEDRRQSGAGSYQLT | J28 | V28   | ASSFGFSNTEAF     | J1-1 |
|    | 4-5  | 3.8 | V13-1 | AASMNNQGGKLI     | J23 | V3-1  | ASSQVRTGAYSNQPQH | J1-5 |
|    | 4-6  | 3.7 | V13-1 | AASHGGSQGNLI     | J42 | V9    | ASSVEVSGSYNEQF   | J2-1 |
|    | 4-7  | 3.4 | V21   | AGYNNDMR         | J43 | V4-1  | ASSQGGQNYGYT     | J1-2 |
|    | 4-8  | 3.1 | V1-1  | ADRMDSNYQLI      | J33 | V20-1 | SASPGQGADTQY     | J2-3 |
|    | 4-9  | 2.9 | V12-2 | AVRTKGGYQKVT     | J13 | V20-1 | SPRGGGTEAF       | J1-1 |
|    | 4-10 | 2.8 | V13-1 | AASHGGSQGNLI     | J42 | V27   | ASSYGVGGSIQY     | J2-4 |

CDR3, complementarity-determining region 3; TRA, T cell receptor alpha; TRAJ, TRA joining; TRAV, TRA variable; TRB, T cell receptor beta; TRBJ, TRB variable; TRBV, TRB variable.

**Supplementary Table S5. Top five CDR3 motif of TRA in CD8+ cells and clustering**

| S1 | Total | 1 | 2 | 3 | 4 | 5  | 6  | 7 | 8 | 9 | 10 |
|----|-------|---|---|---|---|----|----|---|---|---|----|
| 1  | 31    | 3 | 0 | 0 | 0 | 21 | 5  | 0 | 0 | 1 | 1  |
| 2  | 75    | 4 | 1 | 0 | 0 | 34 | 34 | 0 | 2 | 0 | 0  |
| 3  | 12    | 0 | 0 | 0 | 0 | 8  | 3  | 0 | 1 | 0 | 0  |
| 4  | 13    | 0 | 0 | 0 | 0 | 9  | 3  | 0 | 1 | 0 | 0  |
| 5  | 85    | 5 | 1 | 0 | 1 | 52 | 26 | 0 | 0 | 0 | 0  |

| S2 | Total | 1 | 2 | 3  | 4 | 5 | 6   | 7   | 8 | 9 | 10 | 11 |
|----|-------|---|---|----|---|---|-----|-----|---|---|----|----|
| 1  | 35    | 0 | 1 | 2  | 0 | 0 | 26  | 1   | 0 | 1 | 1  | 3  |
| 2  | 180   | 1 | 1 | 4  | 0 | 0 | 64  | 104 | 0 | 0 | 0  | 6  |
| 3  | 10    | 0 | 0 | 0  | 0 | 0 | 7   | 1   | 1 | 0 | 0  | 1  |
| 4  | 13    | 0 | 0 | 0  | 0 | 0 | 11  | 2   | 0 | 0 | 0  | 0  |
| 5  | 399   | 2 | 6 | 22 | 0 | 0 | 296 | 51  | 1 | 1 | 3  | 17 |

| S3 | Total | 1 | 2 | 3  | 4  | 5  | 6   | 7  | 8 | 9  | 10 | 11 | 12 | 13 | 14 | 15 | 16 | 17 | 18 | 19 |
|----|-------|---|---|----|----|----|-----|----|---|----|----|----|----|----|----|----|----|----|----|----|
| 1  | 61    | 0 | 2 | 2  | 22 | 12 | 18  | 1  | 0 | 0  | 1  | 2  | 0  | 1  | 0  | 0  | 0  | 0  | 0  | 0  |
| 2  | 90    | 1 | 1 | 3  | 25 | 12 | 42  | 1  | 0 | 3  | 0  | 1  | 0  | 0  | 1  | 0  | 0  | 0  | 0  | 0  |
| 3  | 20    | 0 | 0 | 0  | 1  | 4  | 1   | 1  | 1 | 11 | 0  | 0  | 0  | 0  | 1  | 0  | 0  | 0  | 0  | 0  |
| 4  | 17    | 0 | 0 | 0  | 7  | 5  | 5   | 0  | 0 | 0  | 0  | 0  | 0  | 0  | 0  | 0  | 0  | 0  | 0  | 0  |
| 5  | 436   | 6 | 6 | 15 | 65 | 72 | 180 | 20 | 3 | 45 | 2  | 12 | 1  | 7  | 2  | 0  | 0  | 0  | 0  | 0  |

| S4 | Total | 1 | 2 | 3 | 4 | 5  | 6  | 7 | 8 | 9 | 10 | 11 |
|----|-------|---|---|---|---|----|----|---|---|---|----|----|
| 1  | 14    | 1 | 2 | 0 | 0 | 1  | 9  | 0 | 0 | 1 | 0  | 0  |
| 2  | 123   | 4 | 7 | 0 | 5 | 41 | 61 | 2 | 0 | 3 | 0  | 0  |
| 3  | 16    | 0 | 0 | 0 | 1 | 9  | 4  | 0 | 1 | 0 | 1  | 0  |

|   |     |   |    |   |   |     |     |   |   |   |   |   |
|---|-----|---|----|---|---|-----|-----|---|---|---|---|---|
| 4 | 81  | 0 | 0  | 0 | 4 | 36  | 39  | 1 | 0 | 1 | 0 | 0 |
| 5 | 548 | 5 | 25 | 5 | 8 | 186 | 297 | 5 | 1 | 9 | 3 | 4 |

CDR3, complementarity-determining region 3; TRA, T cell receptor alpha; TRB, T cell receptor beta.

Supplementary Table S6. Top five CDR3 motif of TRB in CD8+ cells and clustering

| S1 | Total | 1  | 2  | 3 | 4 | 5   | 6   | 7 | 8 | 9  | 10 |
|----|-------|----|----|---|---|-----|-----|---|---|----|----|
| 1  | 648   | 16 | 43 | 0 | 5 | 194 | 358 | 2 | 0 | 21 | 8  |
| 2  | 16    | 0  | 0  | 0 | 3 | 11  | 2   | 0 | 0 | 0  | 0  |
| 3  | 19    | 1  | 1  | 0 | 0 | 5   | 12  | 0 | 0 | 0  | 0  |
| 4  | 63    | 2  | 1  | 0 | 1 | 18  | 38  | 0 | 0 | 0  | 3  |
| 5  | 7     | 0  | 0  | 0 | 0 | 0   | 6   | 1 | 0 | 0  | 0  |

| S2 | Total | 1 | 2  | 3  | 4 | 5 | 6   | 7   | 8 | 9 | 10 | 11 |
|----|-------|---|----|----|---|---|-----|-----|---|---|----|----|
| 1  | 883   | 7 | 10 | 50 | 0 | 1 | 596 | 163 | 3 | 0 | 10 | 42 |
| 2  | 9     | 0 | 2  | 0  | 0 | 0 | 2   | 3   | 0 | 0 | 0  | 2  |
| 3  | 0     | 0 | 0  | 0  | 0 | 0 | 0   | 0   | 0 | 0 | 0  | 0  |
| 4  | 125   | 2 | 1  | 4  | 0 | 0 | 108 | 4   | 0 | 0 | 3  | 3  |
| 5  | 0     | 0 | 0  | 0  | 0 | 0 | 0   | 0   | 0 | 0 | 0  | 0  |

| S3 | Total | 1 | 2  | 3 | 4   | 5   | 6 | 7 | 8 | 9   | 10 | 11 | 12 | 13 | 14 | 15 | 16 | 17 | 18 | 19 |
|----|-------|---|----|---|-----|-----|---|---|---|-----|----|----|----|----|----|----|----|----|----|----|
| 1  | 499   | 8 | 11 | 5 | 186 | 180 | 2 | 0 | 3 | 104 | 0  | 0  | 0  | 0  | 0  | 0  | 0  | 0  | 0  | 0  |
| 2  | 1     | 0 | 0  | 1 | 0   | 0   | 0 | 0 | 0 | 0   | 0  | 0  | 0  | 0  | 0  | 0  | 0  | 0  | 0  | 0  |
| 3  | 14    | 3 | 1  | 0 | 6   | 4   | 0 | 0 | 0 | 0   | 0  | 0  | 0  | 0  | 0  | 0  | 0  | 0  | 0  | 0  |
| 4  | 55    | 0 | 0  | 2 | 16  | 25  | 0 | 0 | 0 | 12  | 0  | 0  | 0  | 0  | 0  | 0  | 0  | 0  | 0  | 0  |
| 5  | 21    | 1 | 2  | 1 | 11  | 5   | 0 | 0 | 0 | 1   | 0  | 0  | 0  | 0  | 0  | 0  | 0  | 0  | 0  | 0  |

| S4 | Total | 1  | 2  | 3 | 4 | 5   | 6   | 7 | 8 | 9  | 10 | 11 |
|----|-------|----|----|---|---|-----|-----|---|---|----|----|----|
| 1  | 647   | 16 | 43 | 0 | 5 | 194 | 358 | 2 | 0 | 21 | 8  | 0  |
| 2  | 16    | 0  | 0  | 0 | 3 | 11  | 2   | 0 | 0 | 0  | 0  | 0  |
| 3  | 24    | 3  | 2  | 0 | 0 | 5   | 14  | 0 | 0 | 0  | 0  | 0  |

|   |    |   |   |   |   |    |    |   |   |   |   |   |
|---|----|---|---|---|---|----|----|---|---|---|---|---|
| 4 | 65 | 3 | 1 | 0 | 1 | 18 | 42 | 0 | 0 | 0 | 3 | 0 |
| 5 | 35 | 1 | 5 | 0 | 4 | 15 | 10 | 0 | 0 | 0 | 0 | 0 |

CDR3, complementarity-determining region 3; TRA, T cell receptor alpha; TRB, T cell receptor beta.



**Supplementary Table S7. Top five CDR3 motif of TRA in FOXP3+ cells and clustering**

| S1 | Total | 1 | 2 | 3 | 4 | 5  | 6 | 7 | 8 | 9 | 10 |
|----|-------|---|---|---|---|----|---|---|---|---|----|
| 1  | 2     | 2 | 0 | 0 | 0 | 0  | 0 | 0 | 0 | 0 | 0  |
| 2  | 2     | 1 | 0 | 0 | 0 | 1  | 0 | 0 | 0 | 0 | 0  |
| 3  | 2     | 1 | 0 | 0 | 0 | 1  | 0 | 0 | 0 | 0 | 0  |
| 4  | 24    | 7 | 0 | 0 | 3 | 11 | 3 | 0 | 0 | 0 | 0  |
| 5  | 4     | 3 | 0 | 0 | 0 | 0  | 1 | 0 | 0 | 0 | 0  |

| S2 | Total | 1 | 2 | 3 | 4 | 5 | 6 | 7 | 8  | 9 | 10 | 11 |
|----|-------|---|---|---|---|---|---|---|----|---|----|----|
| 1  | 8     | 0 | 1 | 0 | 2 | 0 | 0 | 0 | 5  | 0 | 0  | 0  |
| 2  | 5     | 0 | 0 | 0 | 1 | 0 | 0 | 0 | 4  | 0 | 0  | 0  |
| 3  | 8     | 0 | 2 | 0 | 0 | 0 | 0 | 0 | 6  | 0 | 0  | 0  |
| 4  | 26    | 1 | 2 | 0 | 1 | 0 | 0 | 0 | 22 | 0 | 0  | 0  |
| 5  | 2     | 0 | 1 | 0 | 0 | 0 | 0 | 0 | 1  | 0 | 0  | 0  |

| S3 | Total | 1 | 2 | 3 | 4 | 5 | 6 | 7 | 8 | 9 | 10 | 11 | 12 | 13 | 14 | 15 | 16 | 17 | 18 | 19 |
|----|-------|---|---|---|---|---|---|---|---|---|----|----|----|----|----|----|----|----|----|----|
| 1  | 11    | 1 | 0 | 0 | 0 | 0 | 1 | 0 | 0 | 0 | 0  | 0  | 0  | 0  | 9  | 0  | 0  | 0  | 0  | 0  |
| 2  | 18    | 0 | 0 | 2 | 0 | 0 | 1 | 0 | 0 | 0 | 0  | 1  | 1  | 0  | 13 | 0  | 0  | 0  | 0  | 0  |
| 3  | 9     | 0 | 0 | 3 | 0 | 0 | 0 | 0 | 0 | 0 | 0  | 0  | 1  | 0  | 5  | 0  | 0  | 0  | 0  | 0  |
| 4  | 39    | 0 | 0 | 3 | 0 | 0 | 2 | 0 | 0 | 0 | 0  | 1  | 3  | 2  | 28 | 0  | 0  | 0  | 0  | 0  |
| 5  | 6     | 0 | 0 | 3 | 0 | 0 | 0 | 0 | 0 | 0 | 0  | 1  | 0  | 0  | 2  | 0  | 0  | 0  | 0  | 0  |

[illegible]

|   |    |   |    |   |   |   |   |   |   |   |   |   |
|---|----|---|----|---|---|---|---|---|---|---|---|---|
| 4 | 22 | 2 | 17 | 0 | 0 | 0 | 0 | 0 | 0 | 0 | 3 | 0 |
| 5 | 2  | 0 | 1  | 0 | 0 | 0 | 0 | 0 | 0 | 0 | 1 | 0 |

CDR3, complementarity-determining region 3; TRA, T cell receptor alpha; TRB, T cell receptor beta.

**Supplementary Table S8. Top five CDR3 motif of TRB in FOXP3+ cells and clustering**

| S1 | Total | 1 | 2  | 3 | 4 | 5 | 6 | 7 | 8 | 9 | 10 |
|----|-------|---|----|---|---|---|---|---|---|---|----|
| 1  | 6     | 0 | 2  | 0 | 0 | 1 | 2 | 0 | 0 | 1 | 0  |
| 2  | 89    | 3 | 69 | 0 | 0 | 4 | 2 | 0 | 0 | 3 | 8  |
| 3  | 1     | 0 | 1  | 0 | 0 | 0 | 0 | 0 | 0 | 0 | 0  |
| 4  | 3     | 0 | 2  | 0 | 0 | 0 | 1 | 0 | 0 | 0 | 0  |
| 5  | 5     | 0 | 4  | 0 | 0 | 0 | 0 | 0 | 0 | 0 | 1  |

| S2 | Total | 1 | 2 | 3 | 4 | 5 | 6 | 7 | 8  | 9 | 10 | 11 |
|----|-------|---|---|---|---|---|---|---|----|---|----|----|
| 1  | 2     | 0 | 1 | 1 | 0 | 0 | 0 | 0 | 0  | 0 | 0  | 0  |
| 2  | 113   | 4 | 8 | 1 | 3 | 0 | 0 | 0 | 96 | 0 | 0  | 1  |
| 3  | 2     | 1 | 0 | 0 | 0 | 0 | 0 | 0 | 1  | 0 | 0  | 0  |
| 4  | 2     | 0 | 1 | 0 | 0 | 0 | 0 | 0 | 1  | 0 | 0  | 0  |
| 5  | 5     | 1 | 0 | 0 | 0 | 0 | 0 | 0 | 4  | 0 | 0  | 0  |

| S3 | Total | 1 | 2 | 3  | 4 | 5 | 6 | 7 | 8 | 9 | 10 | 11 | 12 | 13 | 14  | 15 | 16 | 17 | 18 | 19 |
|----|-------|---|---|----|---|---|---|---|---|---|----|----|----|----|-----|----|----|----|----|----|
| 1  | 6     | 0 | 0 | 1  | 0 | 0 | 0 | 0 | 0 | 0 | 0  | 0  | 0  | 1  | 4   | 0  | 0  | 0  | 0  | 0  |
| 2  | 163   | 0 | 0 | 35 | 0 | 0 | 4 | 0 | 0 | 0 | 0  | 7  | 4  | 7  | 106 | 0  | 0  | 0  | 0  | 0  |
| 3  | 2     | 0 | 0 | 0  | 0 | 0 | 0 | 0 | 0 | 0 | 0  | 1  | 0  | 0  | 1   | 0  | 0  | 0  | 0  | 0  |
| 4  | 7     | 0 | 0 | 2  | 0 | 0 | 0 | 0 | 0 | 0 | 0  | 0  | 0  | 1  | 4   | 0  | 0  | 0  | 0  | 0  |
| 5  | 3     | 0 | 0 | 0  | 0 | 0 | 0 | 0 | 0 | 0 | 0  | 0  | 0  | 0  | 3   | 0  | 0  | 0  | 0  | 0  |

[illegible]

|   |   |   |   |   |   |   |   |   |   |   |   |   |
|---|---|---|---|---|---|---|---|---|---|---|---|---|
| 4 | 3 | 0 | 2 | 0 | 0 | 0 | 1 | 0 | 0 | 0 | 0 | 0 |
| 5 | 5 | 0 | 4 | 0 | 0 | 0 | 0 | 0 | 0 | 0 | 1 | 0 |

CDR3, complementarity-determining region 3; TRA, T cell receptor alpha; TRB, T cell receptor beta.

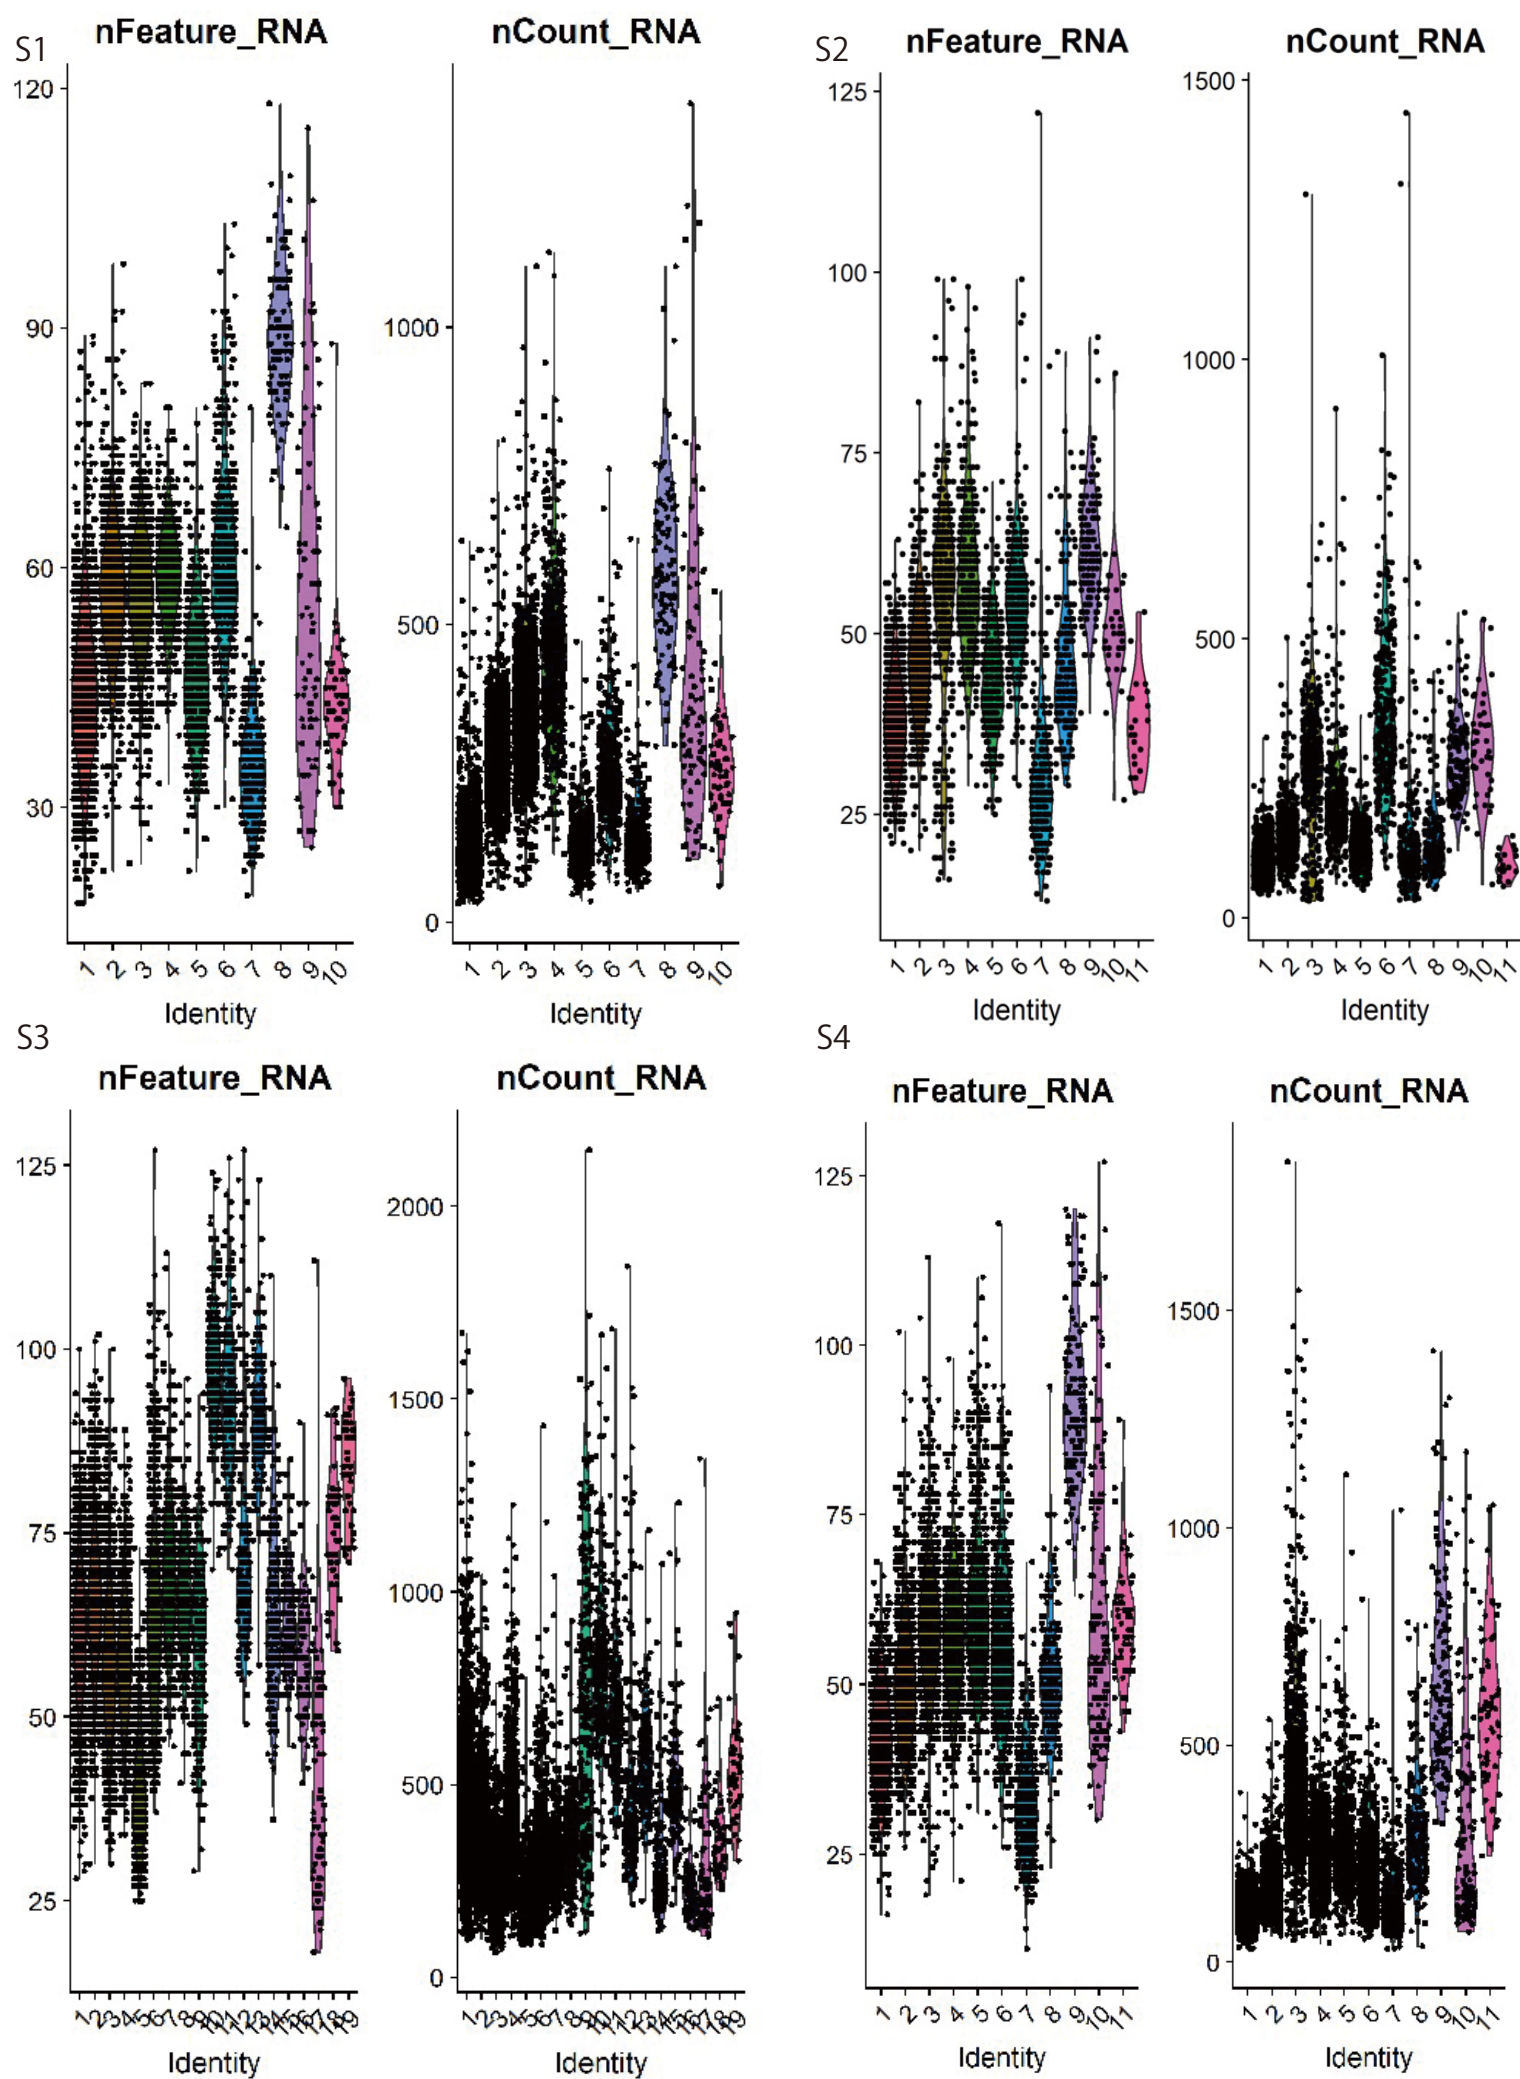







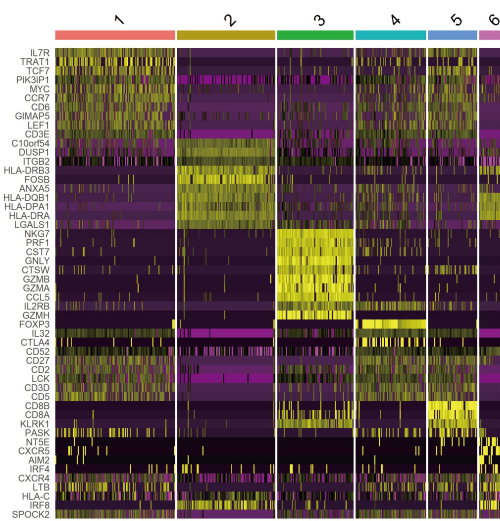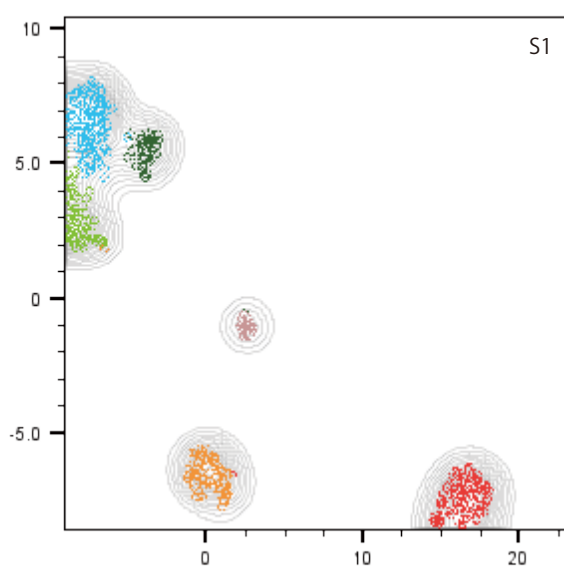

| Cluster name                | Count |
|-----------------------------|-------|
| Cluster 6 Unknown           | 23.0  |
| Cluster 5 CD8B+ T8n cells   | 50.0  |
| Cluster 4 FOXP3+ Treg cells | 72.0  |
| Cluster 3 KLRF1+ NK cells   | 78.0  |
| Cluster 2 Unknown           | 100   |
| Cluster 1 IL7R+ T4 cells    | 122   |
| Ungated                     | 445   |

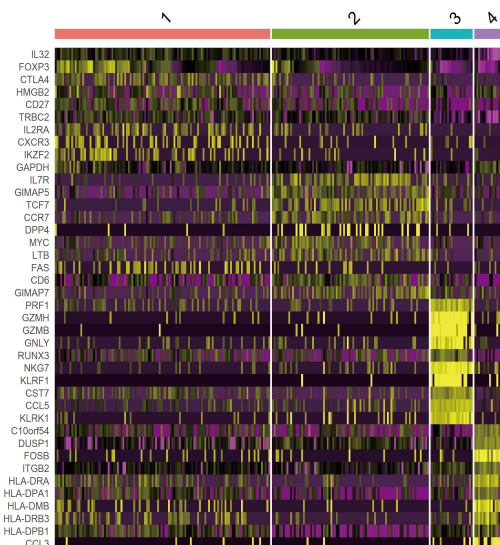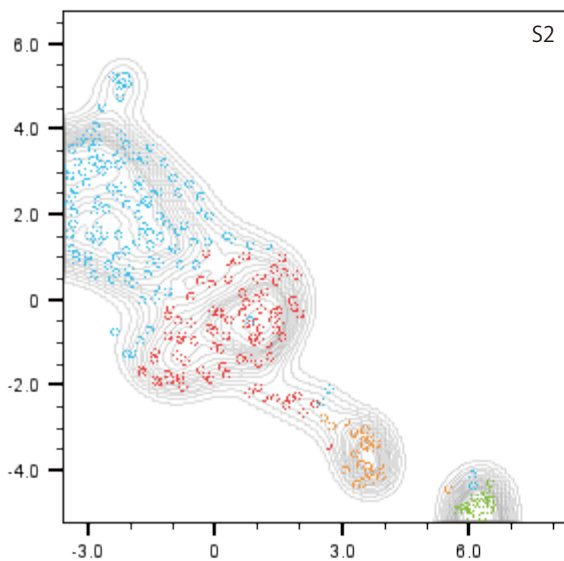

| Cluster name                | Count |
|-----------------------------|-------|
| Cluster 4 Unknown           | 15.0  |
| Cluster 3 KLRF1+ NK cells   | 23.0  |
| Cluster 2 IL7R+ T4 cells    | 86.0  |
| Cluster 1 FOXP3+ Treg cells | 118   |
| Ungated                     | 242   |

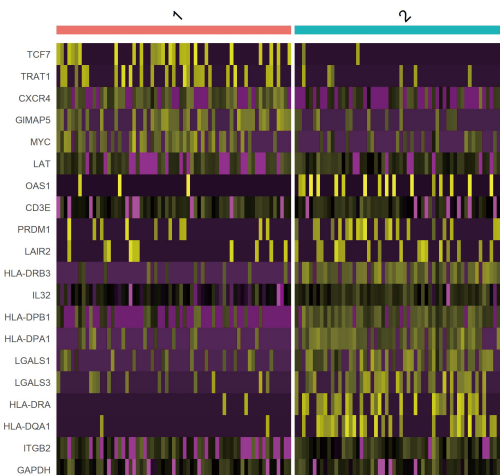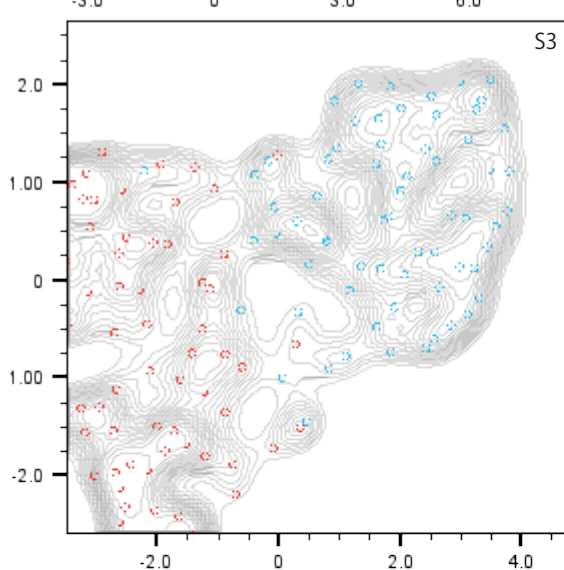

| Cluster name      | Count |
|-------------------|-------|
| Cluster 2 Unknown | 59.0  |
| Cluster 1 Unknown | 65.0  |
| Ungated           | 124   |

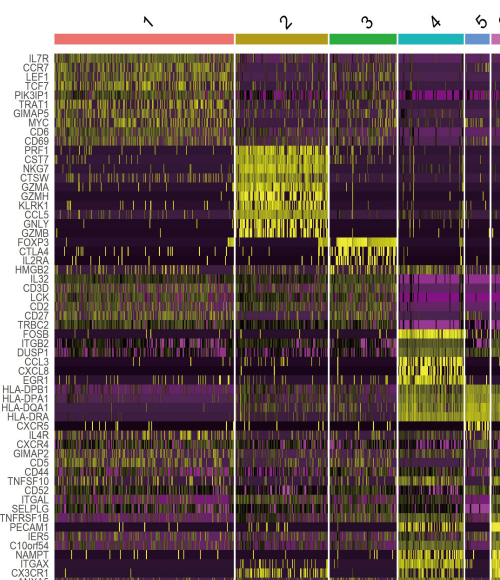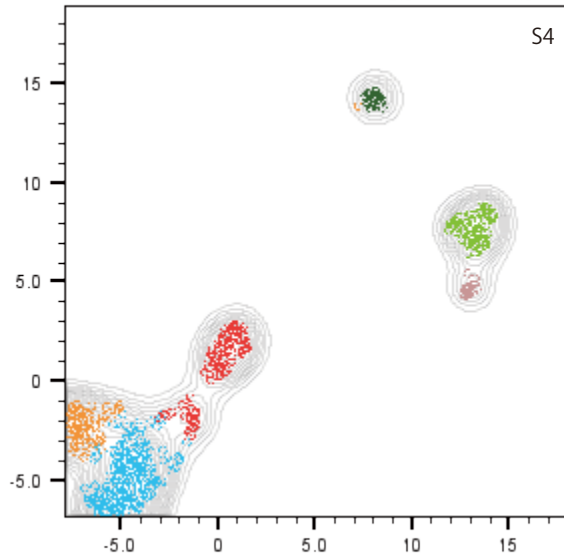

| Cluster name                | Count |
|-----------------------------|-------|
| Cluster 6 Unknown           | 21.0  |
| Cluster 5 Unknown           | 28.0  |
| Cluster 4 Unknown           | 75.0  |
| Cluster 3 FOXP3+ Treg cells | 77.0  |
| Cluster 2 Unknown           | 106   |
| Cluster 1 IL7R+ T4 cells    | 206   |
| Ungated                     | 513   |

Supplementary Figure S4



# A TRA CD8+ cells

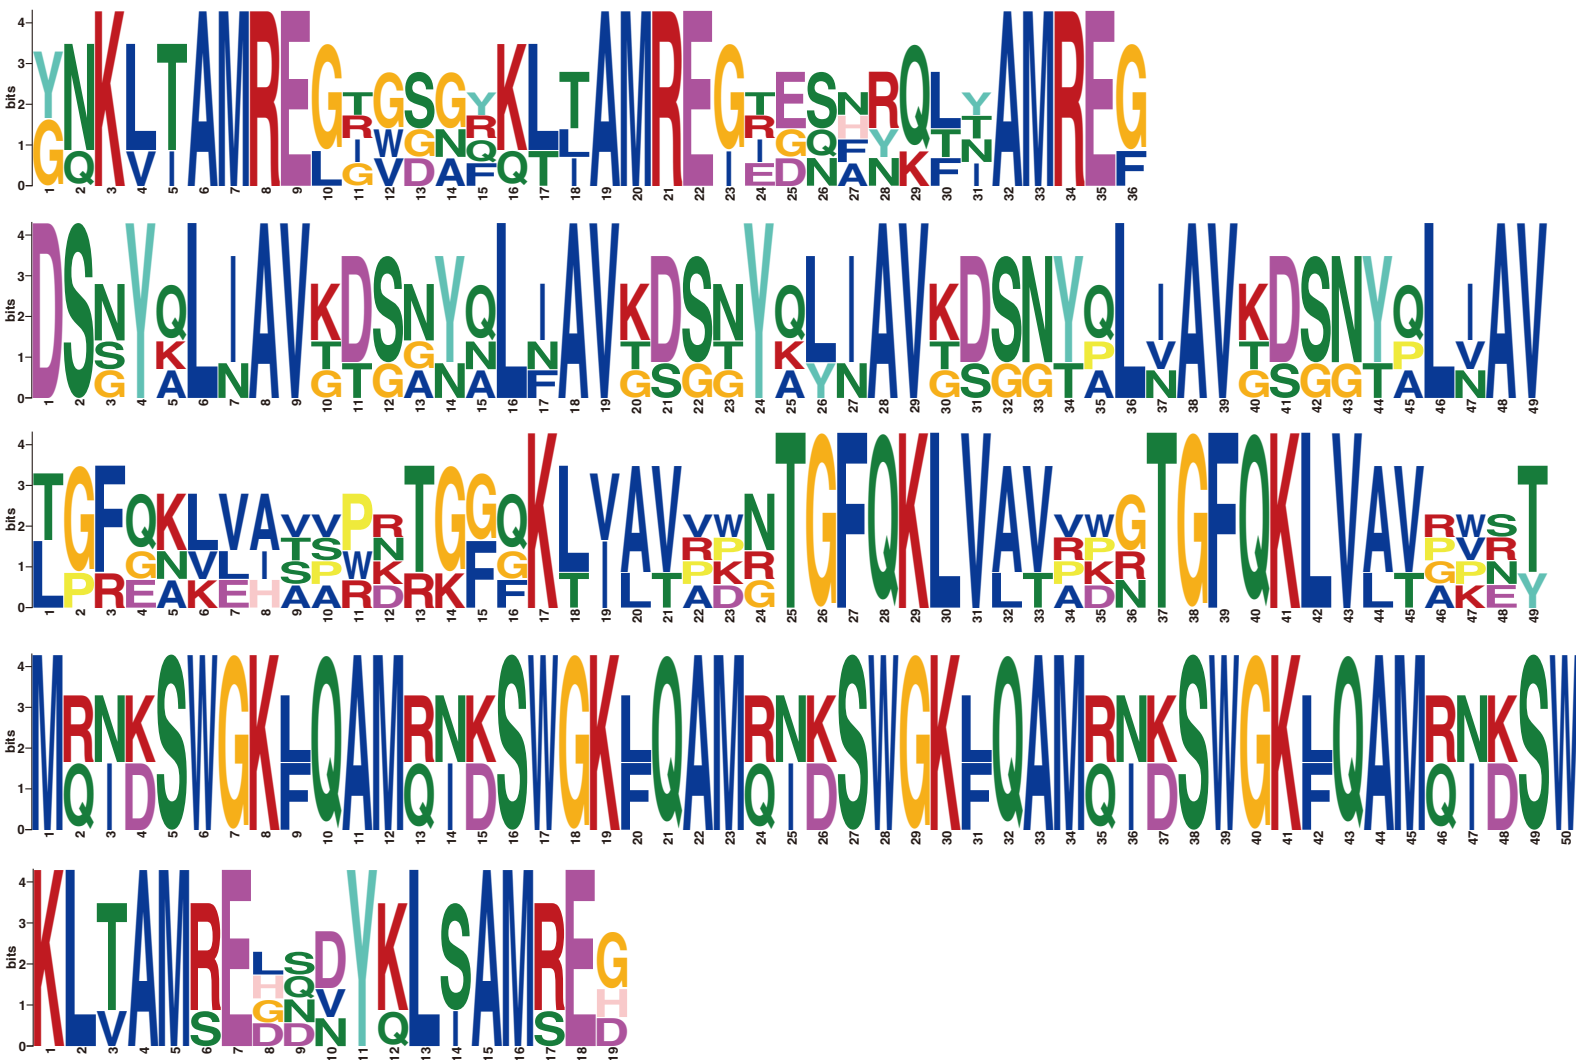

# B TRB CD8+ cells

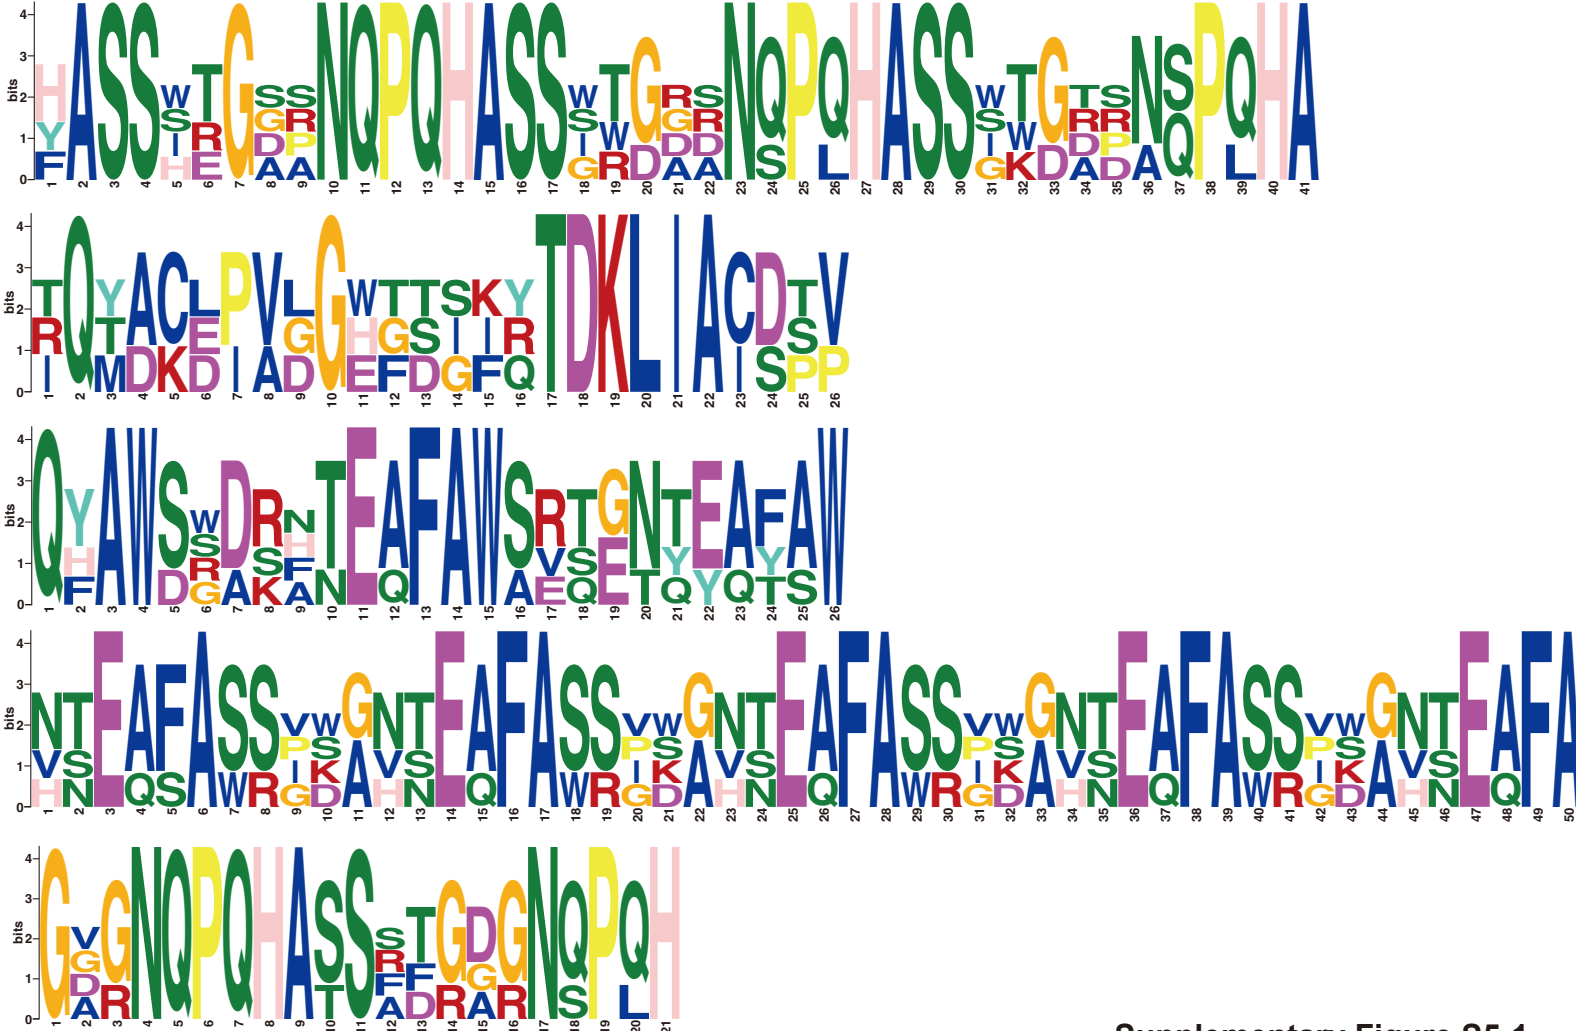

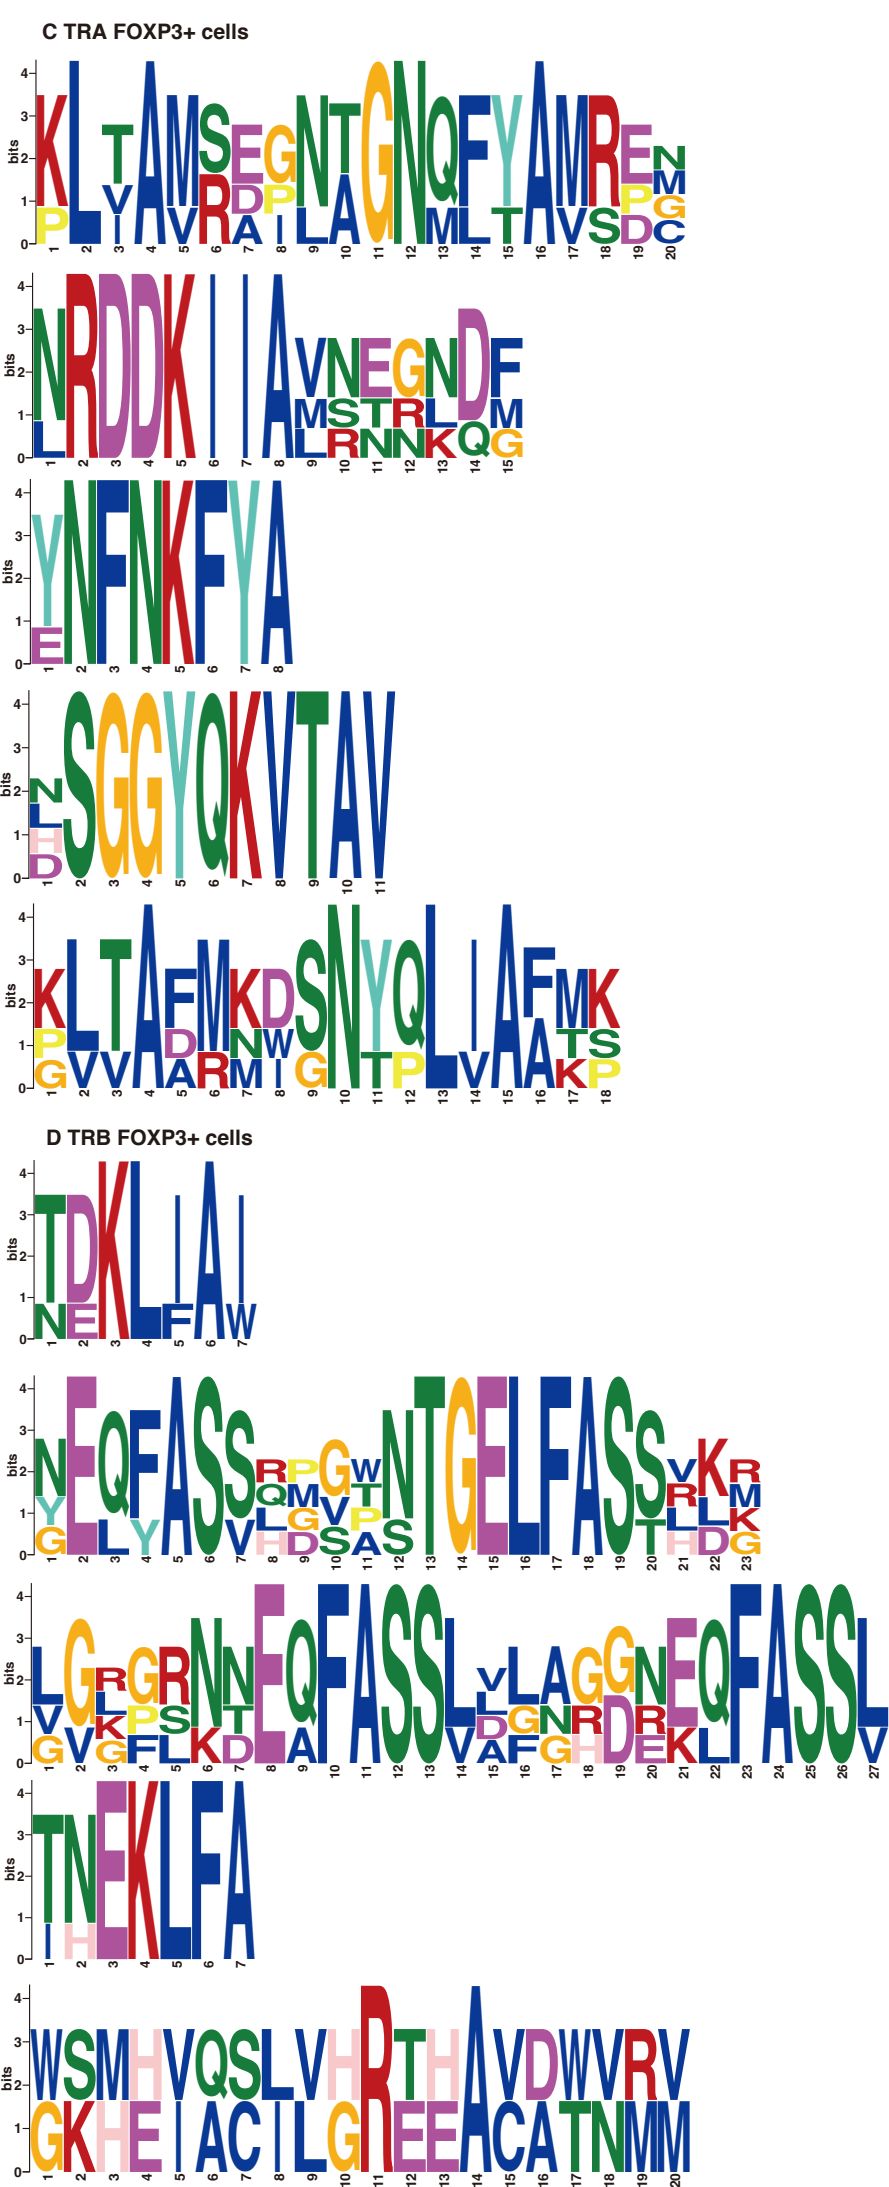

Supplement: s1 [file s1]
